# Supplementary material for: Dbo/Henji Modulates Synaptic dPAK to Gate Glutamate Receptor Abundance and Postsynaptic Response
Source: PubMed Central journal article supplement (PMC5065118; doi:10.1371/journal.pgen.1006362), 2016-10-13

# Supplementary Figure 7

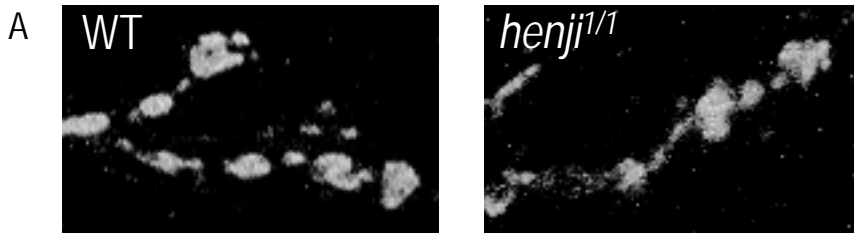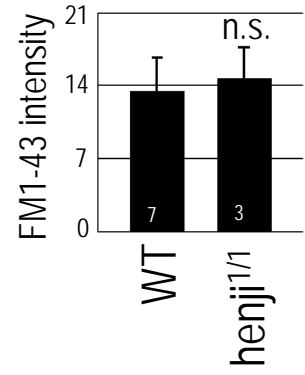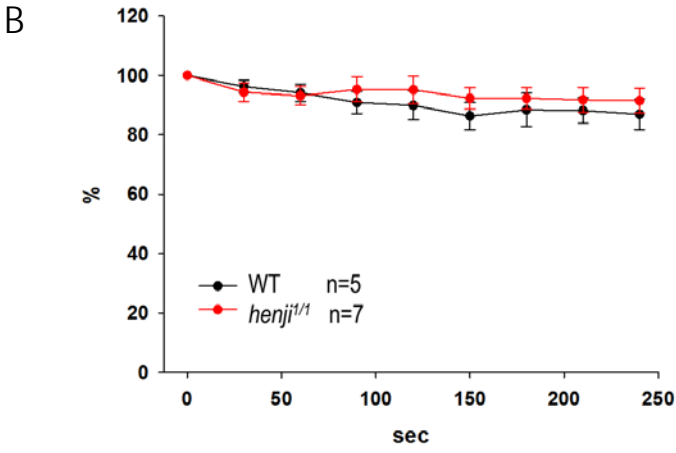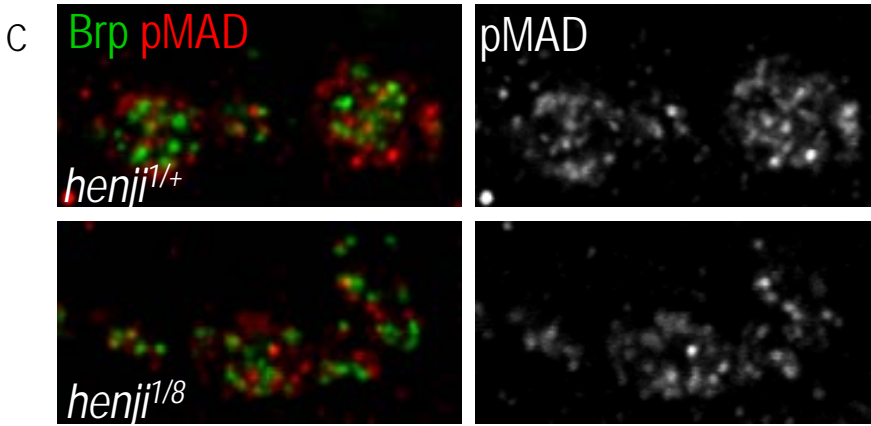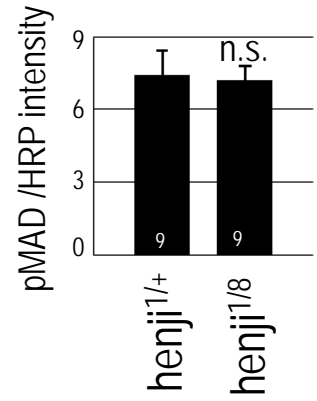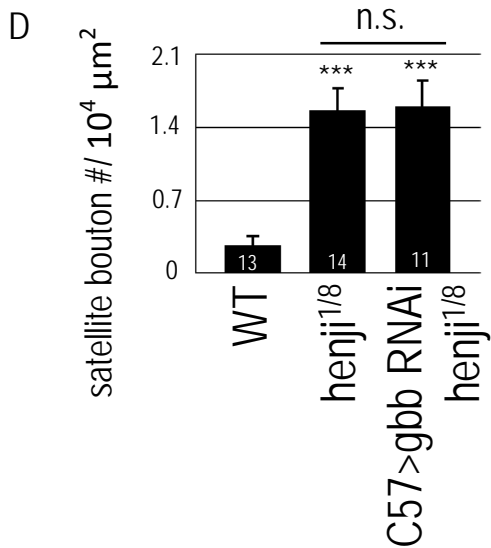

Supplement: pgen.1006362.s007.pdf [file pgen.1006362.s007.pdf]
